# Supplementary material for: DIP–STR: Highly Sensitive Markers for the Analysis of Unbalanced Genomic Mixtures
Source: PubMed Central journal article supplement (PMC3675636; doi:10.1002/humu.22280), 2013-01-25
Supplement: humu0034-0644-SD1.pdf [file humu0034-0644-SD1.pdf]

**Supp. Table S1. DIP-STR primers**

| <b>Marker</b>       | <b>DIP primers</b>                                       | <b>STR primers</b>                                           | <b>S- and L-DIP allele specific primers</b>                       |
|---------------------|----------------------------------------------------------|--------------------------------------------------------------|-------------------------------------------------------------------|
| MID1013-D5S490      | NED-AGGATCTCATGCAGGATAC<br>TGTTGTTTAGCTTCCTGGAC          | VIC- GAATCTGAAGGTGTTCTAAAAGTAA<br>*AAAGTGAGGAGTCAAGGAGG      | S-6FAM-GGTCTGTCATTACCCA.GTATTC<br>L-6FAM-GGTCTGTCATTACCCA.CTGG    |
| MID1950-D20S473     | 6FAM- AAAGTGTGTCAGATCATTGAA<br>ATCCTTCTGGAAAGATGCTT      | *NED- TCATGAGCTAAATATTACTCAGTGC<br>CTTATAGCTTTTTTCAAATGATCTG | S-AAAGATGCTTTATATTTCCAGTT.TAG<br>L-AAAGATGCTTTATATTTCCAGTT.ATT    |
| MID1107-D5S1980     | VIC-CTGAAGCTAAGAAATGCTAAAAA<br>GGCACCTTAGTGATATGGG       | *NED- CATGTTTGTACCTAGTAAAGACC<br>ATGAAATGTACCTGCCTTG         | S-TTACTACTAGGAGGCTCTCTT.CATC<br>L-TTACTACTAGGAGGCTCTCTT.TGTT      |
| rs11277790-D10S530  | VIC-GCTCAAAGATAAGGCCAGGA<br>TGTGTGTTTTCCCAAGTCC          | *6FAM-TCTAGCAGTAAGAGTTGTGTCTCC<br>TTGACAAGGCCATCAAAAC        | S-TGAATCCTTTGCTGTAATCTC.GGGA<br>L-AATCCTTTGCTGTAATCTC.TCCAAC      |
| rs60194384-D15S1514 | VIC-CAGCATGACATTAATCAAAAAGAA<br>TTGTGACAATGAAATTCTTGGTTT | AATTGGAAATATACGTATAAACTCA<br>*6FAM-GTCACTGCCACTGGGATATT      | S-AGAGAGAATCAAAAAGTCAA.ATATAC<br>L-AGAGAGAATCAAAAAGTCAA.TCTTAA    |
| rs67842608-D5S468   | VIC-CAGATGTTAGCACTGGTTTGC<br>TTTTCTGTGCTTGCCTCTCA        | *6FAM-AAATGAATGGTAGATTTAACCTGAG<br>TGGGAAAATAAATACATGCG      | S-TCATGATCCTTAAAAAGT.TTTTGG<br>L-TCATGATCCTTAAAAAGT.TGGTTTAA      |
| rs66679498-D2S342   | VIC-CAATTGTTGAATGGTTTTGTTGA<br>TTTTGAAGGATGCTGTGGTG      | *VIC-CTGAGAGTCTGCACTGG<br>CTCAACAAAACCATTCAACA               | S-AAAGAAGACACTATTGT.GGGG<br>L-AGACACTATTGT.GTAGGAGAA              |
| rs10564579-D3S1282  | VIC-CCCAAGTCACTGTCCATCAA<br>TTGTAGGGCTTGAAGAAAA          | *VIC-GGCAGTACCACCTGTAGAAATG<br>GAGTAACAGAGGCATCGTGTATTC      | S-CTCCTACCTTGAAAAAGACTT.TATAATG<br>L-CTCCTACCTTGAAAAAGACTT.TATGAC |
| rs35708668-D5S2045  | VIC-AACCTGTCTTGGGGCTTACA<br>ACTTGTACCCCACTTGTC           | CAGAGACAGTCATTTACAGAAGAG<br>*VIC-CAGCCCCATACTTGCTTG          | S-CATTACTAGGGTGAC.CCAG<br>L-ACTAGGGTGAC.TACTATGTAC                |

\* Primer used for DIP-STR amplification with S- or L-DIP allele specific primer. In the last column dots indicate the insertion/deletion points.

**Supp. Table S2. DIP-STR haplotype frequencies**

| MID1013-D5S490  |       | MID1950-D20S473 |       | MID1107-D5S1980 |       | rs11277790-D10S530 |       | rs60194384-D15S1514 |       | rs67842608-D5S468 |       | rs66679498-D2S342 |       | rs10564579-D3S1282 |       | rs35708668-D5S2045 |       |
|-----------------|-------|-----------------|-------|-----------------|-------|--------------------|-------|---------------------|-------|-------------------|-------|-------------------|-------|--------------------|-------|--------------------|-------|
| S11             | 0.005 | S8              | 0.005 | S9              | 0.005 | S191               | 0.010 | S112                | 0.010 | S88               | 0.005 | S232              | 0.005 | S144               | 0.020 | S200               | 0.010 |
| S12             | 0.005 | S10             | 0.005 | S16             | 0.005 | S193               | 0.524 | S120                | 0.020 | S90               | 0.010 | S234              | 0.505 | S146               | 0.094 | S202               | 0.029 |
| S13             | 0.034 | S11             | 0.267 | S17             | 0.005 | S195               | 0.097 | S124                | 0.206 | S92               | 0.097 | S236              | 0.015 | S148               | 0.020 | S204               | 0.397 |
| S14             | 0.694 | S12             | 0.286 | S18             | 0.005 | S197               | 0.010 | S128                | 0.235 | S94               | 0.102 | S238              | 0.069 | S150               | 0.040 | S206               | 0.054 |
| S15             | 0.034 | S13             | 0.053 | S19             | 0.203 | S199               | 0.102 | S132                | 0.098 | L86               | 0.039 | S240              | 0.054 | S152               | 0.163 | S208               | 0.010 |
| S16             | 0.005 | L8              | 0.073 | S20             | 0.054 | S201               | 0.029 | S136                | 0.039 | L88               | 0.005 | S247              | 0.005 | S154               | 0.376 | S211               | 0.010 |
| L15             | 0.015 | L9              | 0.005 | S21             | 0.030 | S203               | 0.024 | S140                | 0.005 | L90               | 0.073 | L228              | 0.020 | S158               | 0.015 | S213               | 0.093 |
| L20             | 0.053 | L11             | 0.019 | S22             | 0.005 | S205               | 0.010 | L120                | 0.025 | L92               | 0.034 | L229              | 0.137 | L146               | 0.114 | S214               | 0.005 |
| L21             | 0.029 | L12             | 0.184 | L13             | 0.465 | L179               | 0.010 | L124                | 0.078 | L94               | 0.553 | L230              | 0.167 | L148               | 0.005 | S215               | 0.083 |
| L22             | 0.015 | L13             | 0.102 | L14             | 0.050 | L181               | 0.005 | L128                | 0.147 | L96               | 0.039 | L245              | 0.020 | L150               | 0.119 | S217               | 0.074 |
| L23             | 0.073 |                 |       | L15             | 0.054 | L183               | 0.015 | L132                | 0.093 | L98               | 0.034 | L247              | 0.005 | L154               | 0.025 | S218               | 0.010 |
| L24             | 0.019 |                 |       | L17             | 0.109 | L191               | 0.010 | L136                | 0.044 | L100              | 0.005 |                   |       | L156               | 0.010 | S219               | 0.108 |
| L25             | 0.005 |                 |       | L19             | 0.010 | L197               | 0.063 |                     |       | L102              | 0.005 |                   |       |                    |       | S221               | 0.025 |
| L26             | 0.010 |                 |       |                 |       | L199               | 0.078 |                     |       |                   |       |                   |       |                    |       | S223               | 0.025 |
| L27             | 0.005 |                 |       |                 |       | L203               | 0.015 |                     |       |                   |       |                   |       |                    |       | S225               | 0.010 |
|                 |       |                 |       |                 |       |                    |       |                     |       |                   |       |                   |       |                    |       | S227               | 0.005 |
|                 |       |                 |       |                 |       |                    |       |                     |       |                   |       |                   |       |                    |       | S229               | 0.010 |
|                 |       |                 |       |                 |       |                    |       |                     |       |                   |       |                   |       |                    |       | S231               | 0.005 |
|                 |       |                 |       |                 |       |                    |       |                     |       |                   |       |                   |       |                    |       | L198               | 0.039 |
| CEPH1347-02 DNA |       |                 |       |                 |       |                    |       |                     |       |                   |       |                   |       |                    |       |                    |       |
| S13             |       | S11             |       | S20             |       | S193               |       | S124                |       | S92               |       | S234              |       | S154               |       | S213               |       |
| S14             |       | S11             |       | L13             |       | S205               |       | S128                |       | L94               |       | S238              |       | S156               |       | S215               |       |
